# Supplementary material
Source: HighWire-hosted journal article supplement (https://www.ajnr.org/highwire/filestream/77187/field_highwire_adjunct_files/0/19-01373.pdf)
Supplement: 19-01373.pdf [file 19-01373.pdf]

**On-line Table 1: ASPC between brain volumes derived from standard and Wave-MRPAGE scan-rescan experiments**

| Brain Region  | Standard (Mean) (±SD) | Wave (Mean) (±SD) | Difference (Mean) (±SD) | Paired T Test (P Value) | ANOVA <sup>a</sup> (P Value) |
|---------------|-----------------------|-------------------|-------------------------|-------------------------|------------------------------|
| Brain stem    | 1.91 (4.76)           | 2.40 (3.39)       | 1.44 (1.16)             | .42                     | .28                          |
| Cerebellum    | 2.07 (1.73)           | 2.49 (1.33)       | 1.83 (1.16)             | .56                     | .46                          |
| Cingulate     | 0.52 (0.54)           | 0.81 (0.88)       | 0.69 (0.81)             | .4                      | .09                          |
| Frontal       | 1.04 (1.36)           | 1.40 (1.23)       | 0.63 (0.40)             | .13                     | .25                          |
| Hippocampus   | 1.03 (0.97)           | 0.98 (0.76)       | 0.94 (0.78)             | .9                      | .48                          |
| Insula        | 1.17 (0.75)           | 1.77 (1.04)       | 0.95 (0.63)             | .09                     | 1.00                         |
| Occipital     | 1.96 (1.25)           | 2.16 (1.97)       | 1.60 (1.65)             | .79                     | .38                          |
| Parietal      | 0.99 (0.81)           | 1.10 (0.99)       | 0.63 (0.45)             | .68                     | .44                          |
| Basal ganglia | 0.84 (0.61)           | 0.53 (0.73)       | 0.75 (0.41)             | .26                     | .64                          |
| Temporal      | 1.01 (0.91)           | 1.14 (0.89)       | 1.04 (0.80)             | .77                     | .99                          |
| Total volume  | 0.84 (0.68)           | 1.17 (0.67)       | 0.56 (0.41)             | .08                     | .80                          |

<sup>a</sup> ANOVA to evaluate the interaction of the head coil (20 or 32 channels).

**On-line Table 2: Brain volume quantitative evaluation**

| Structure           | Volume                   |                      |                      | ASPC (Mean) (±SD) | Pearson Coefficient | Dice Coefficient (Mean) (±SD) |
|---------------------|--------------------------|----------------------|----------------------|-------------------|---------------------|-------------------------------|
|                     | Standard (mL) Mean (±SD) | Wave (mL) Mean (±SD) | P Value <sup>a</sup> |                   |                     |                               |
| Left cerebral WM    | 220.8 (28.5)             | 216.3 (27.7)         | .04                  | 2.2 (1.5)         | 0.99 <sup>b</sup>   | 0.93 (0.02)                   |
| Right cerebral WM   | 221.0 (30.0)             | 216.4 (29.6)         | .04                  | 2.2 (1.4)         | 0.99 <sup>b</sup>   |                               |
| Left frontal        | 72.1 (9.1)               | 71.4 (9.1)           | .11                  | 1.4 (1.5)         | 0.99 <sup>b</sup>   | 0.93 (0.03)                   |
| Right frontal       | 71.8 (9.6)               | 71.1 (9.6)           | .26                  | 1.7 (2.3)         | 0.98 <sup>b</sup>   |                               |
| Left parietal       | 44.9 (5.7)               | 44.4 (5.7)           | .18                  | 1.6 (1.4)         | 0.99 <sup>b</sup>   | 0.92 (0.03)                   |
| Right parietal      | 46.8 (6.3)               | 46.2 (6.5)           | .92                  | 2.2 (1.8)         | 0.99 <sup>b</sup>   |                               |
| Left temporal       | 31.7 (5.3)               | 30.9 (5.2)           | .01                  | 3.1 (2.3)         | 0.99 <sup>b</sup>   | 0.90 (0.03)                   |
| Right temporal      | 30.4 (5.1)               | 29.6 (5.0)           | .01                  | 3.2 (2.1)         | 0.99 <sup>b</sup>   |                               |
| Left occipital      | 20.9 (3.1)               | 20.1 (3.2)           | <.001                | 5.7 (4.1)         | 0.93 <sup>b</sup>   | 0.89 (0.03)                   |
| Right occipital     | 21.9 (3.2)               | 20.9 (3.1)           | .01                  | 5.8 (5.1)         | 0.90 <sup>b</sup>   |                               |
| Left cingulate      | 12.9 (1.9)               | 12.9 (1.8)           | <.001                | 1.5 (2.2)         | 0.99 <sup>b</sup>   | 0.92 (0.02)                   |
| Right cingulate     | 11.7 (1.9)               | 11.7 (1.8)           | .89                  | 1.7 (1.8)         | 0.99 <sup>b</sup>   |                               |
| Left insula         | 9.2 (1.6)                | 9.3 (1.5)            | <.001                | 1.9 (1.8)         | 0.99 <sup>b</sup>   | 0.89 (0.02)                   |
| Right insula        | 9.0 (1.6)                | 9.0 (1.6)            | .001                 | 1.9 (1.5)         | 0.99 <sup>b</sup>   |                               |
| Left hippocampus    | 3.6 (0.6)                | 3.5 (0.6)            | .01                  | 4.8 (5.2)         | 0.95 <sup>b</sup>   | 0.91 (0.02)                   |
| Right hippocampus   | 3.7 (0.7)                | 3.6 (0.6)            | <.001                | 3.5 (2.5)         | 0.99 <sup>b</sup>   |                               |
| Left basal ganglia  | 27.0 (2.0)               | 26.7 (3.0)           | .37                  | 1.9 (2.3)         | 0.97 <sup>b</sup>   | 0.93 (0.02)                   |
| Right basal ganglia | 27.3 (3.1)               | 26.9 (3.1)           | .37                  | 1.7 (1.3)         | 0.99 <sup>b</sup>   |                               |
| Brain stem          | 21.1 (2.7)               | 21.2 (3.1)           | .01                  | 2.7 (4.0)         | 0.94 <sup>b</sup>   | 0.95 (0.03)                   |
| Left cerebellum     | 15.6 (2.5)               | 15.9 (2.9)           | .01                  | 5.4 (4.5)         | 0.99 <sup>b</sup>   | 0.86 (0.04)                   |
| Right cerebellum    | 14.7 (2.1)               | 15.1 (2.4)           | <.001                | 5.1 (3.3)         | 0.99 <sup>b</sup>   |                               |

<sup>a</sup> Paired t test;

<sup>b</sup> P < .001.

**On-line Table 3: Basal ganglia subanalysis**

| Structure      | Volume                     |                        | ASPC (Mean) (±SD) | Pearson Coefficient |
|----------------|----------------------------|------------------------|-------------------|---------------------|
|                | Standard (mL) (Mean) (±SD) | Wave (mL) (Mean) (±SD) |                   |                     |
| Left thalamus  | 6.7 (1.0)                  | 6.8 (1.0)              | 3.3 (3.9)         | 0.94                |
| Right thalamus | 6.6 (1.0)                  | 6.7 (1.0)              | 2.6 (3.1)         | 0.97                |
| Left putamen   | 4.5 (0.6)                  | 4.5 (0.6)              | 4.2 (3.7)         | 0.94                |
| Right putamen  | 4.6 (0.6)                  | 4.6 (0.6)              | 3.2 (2.6)         | 0.96                |
| Left caudate   | 3.5 (0.5)                  | 3.5 (0.5)              | 4.0 (3.7)         | 0.94                |
| Right caudate  | 3.7 (0.5)                  | 3.7 (0.5)              | 2.6 (2.1)         | 0.96                |
| Left pallidum  | 2.0 (0.3)                  | 1.9 (0.3)              | 8.7 (10.4)        | 0.7                 |
| Right pallidum | 1.9 (0.3)                  | 1.8 (0.3)              | 8.9 (11.0)        | 0.74                |

**On-line Table 4: Visual rating scales P values for the TOST test, comparing the score difference means**

| Comparison                     | P Value          |                 |
|--------------------------------|------------------|-----------------|
|                                | Lower Bound (-Δ) | Upper Bound (Δ) |
| Standard-Wave                  |                  |                 |
| Anterior-temporal <sup>a</sup> | <.01             | <.01            |
| Cingulate                      | <.01             | .01             |
| Frontoinsular                  | <.01             | <.01            |
| MTA scale                      | <.01             | .01             |
| Orbitofrontal                  | <.01             | .02             |
| Posterior                      | <.01             | <.01            |

**Note:**—MTA indicates medial temporal lobe atrophy; TOST, two 1-sided t test.  
<sup>a</sup>Numbers mean not different from zero and equivalent to zero.

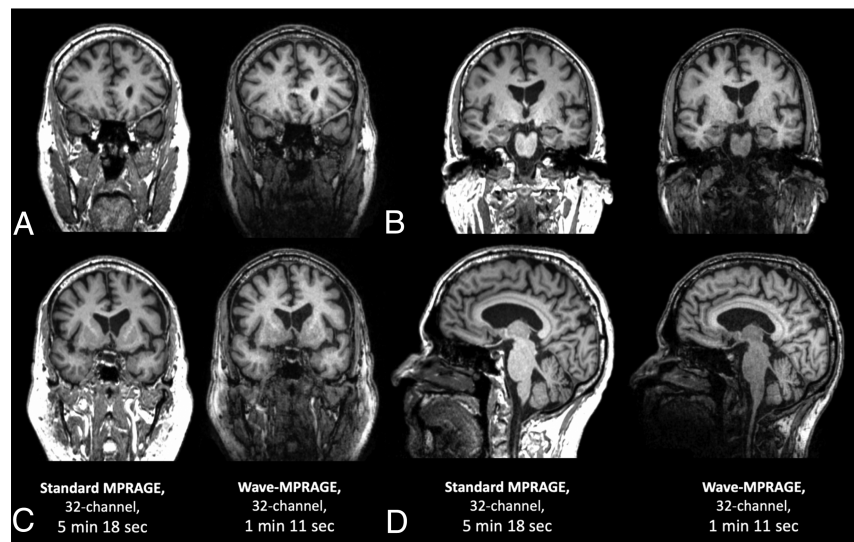

**ON-LINE FIG 1.** Comparison of standard and Wave-MPRAGE images in a patient with right fronto-insular-predominant atrophy. The images demonstrate the anatomic landmarks used for the visual rating scales: anterior cingulate and orbito-frontal (A), medial temporal (B), anterior temporal and fronto-insular (C), and posterior (D). The Wave-MPRAGE sequence showed an increase in image noise compared with standard MPRAGE, which did not affect the volume evaluation.

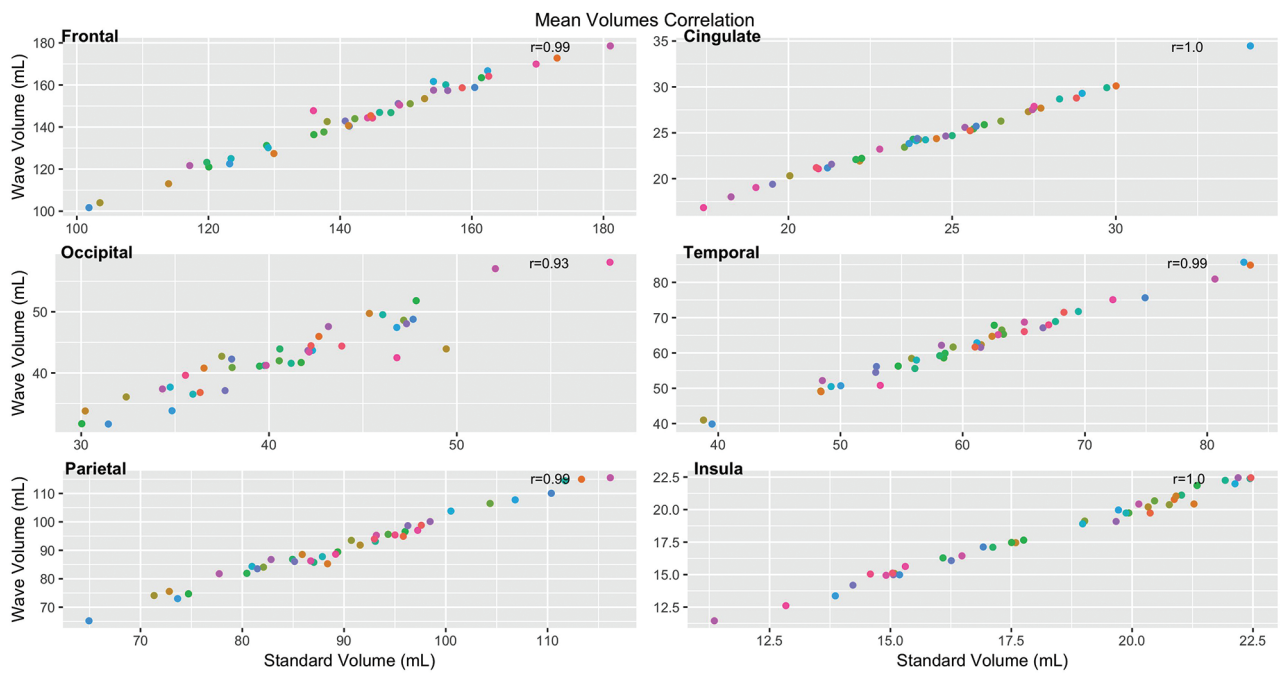

**ON-LINE FIG 2.** Scatterplot demonstrating the correlation of the average volume for each subject comparing the segmentation results for different brain regions using standard and Wave-MPRAGE. Each point and color represent 1 subject, including the volume of bilateral regions.

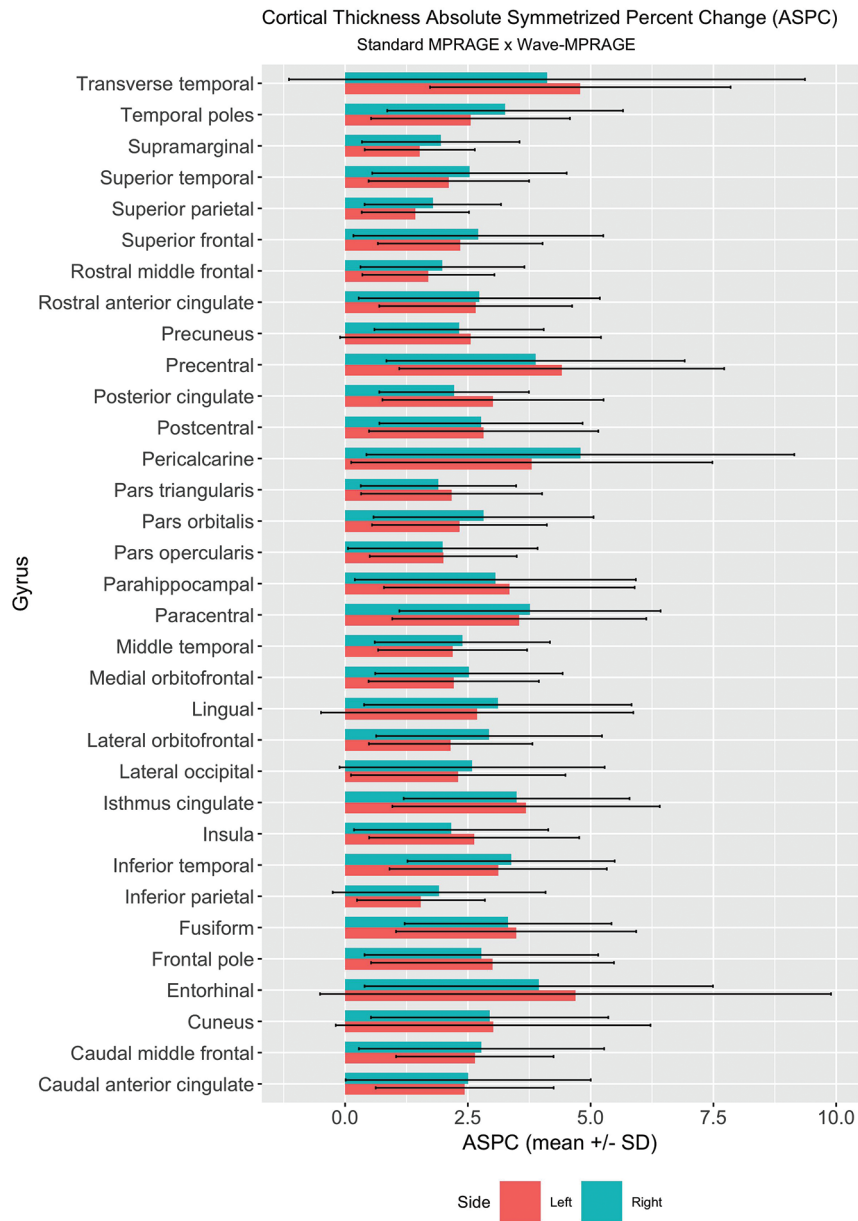

**ON-LINE FIG 3.** Barplot demonstrating the mean and SD of the ASPC for the cortical thickness measurements by region. The differences in thickness between the Wave-MPRAGE and standard MPRAGE sequences are similar to the results of test/retest studies using the same sequence.<sup>29</sup>

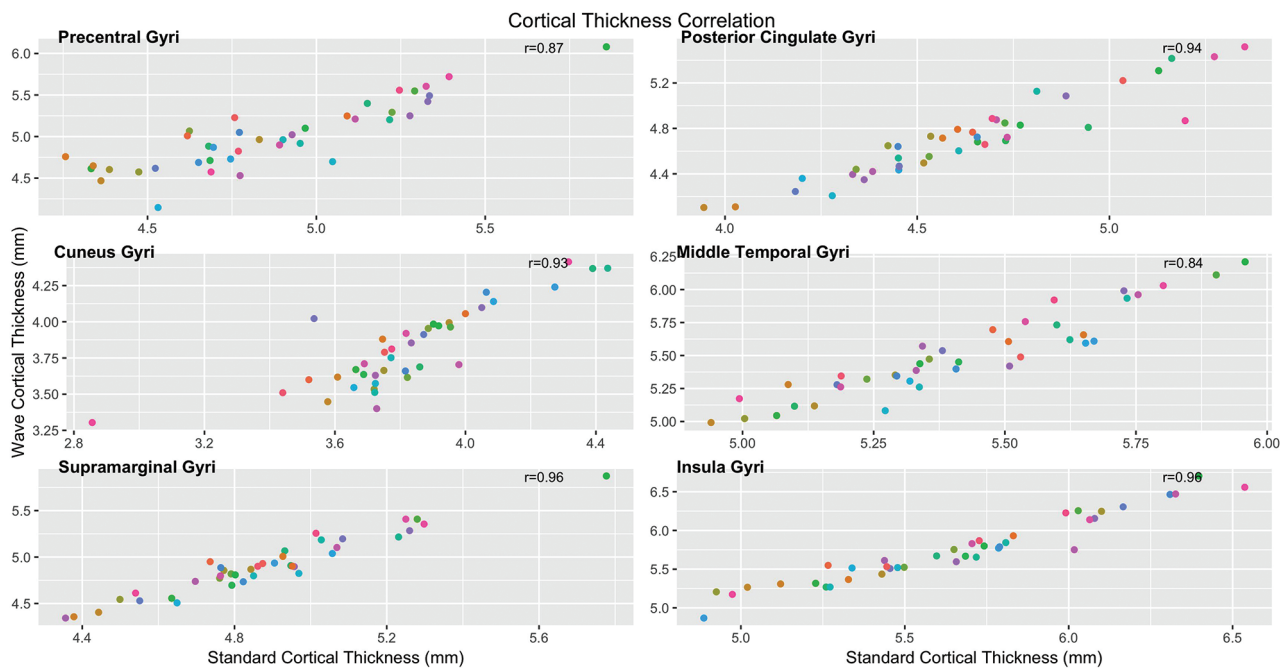

**ON-LINE FIG 4.** Scatterplot demonstrating the correlation of the average cortical thickness for each subject comparing the standard and wave sequences segmentation for different brain regions. Each point and color represent 1 subject, including the area of bilateral gyri.

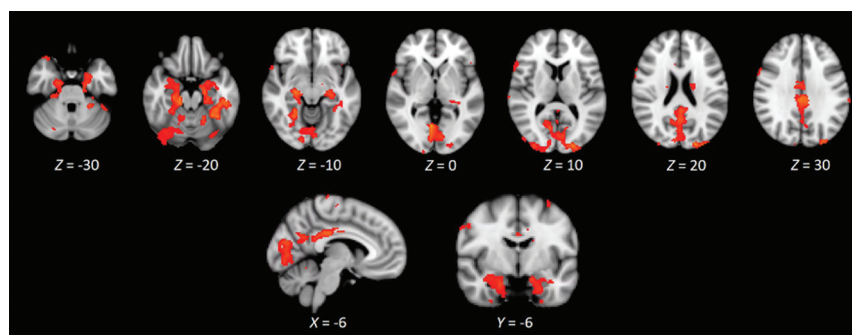

**ON-LINE FIG 5.** Clusters of voxels that differed significantly in signal intensity ( $P < .05$ , corrected for multiple comparisons across space using threshold-free cluster enhancement) between standard and Wave-MPRAGE images in 10 healthy volunteers for representative axial slices (*upper row*) and selected coronal and sagittal slices (*lower row*). Montreal Neurological Institute coordinates are shown below each section.

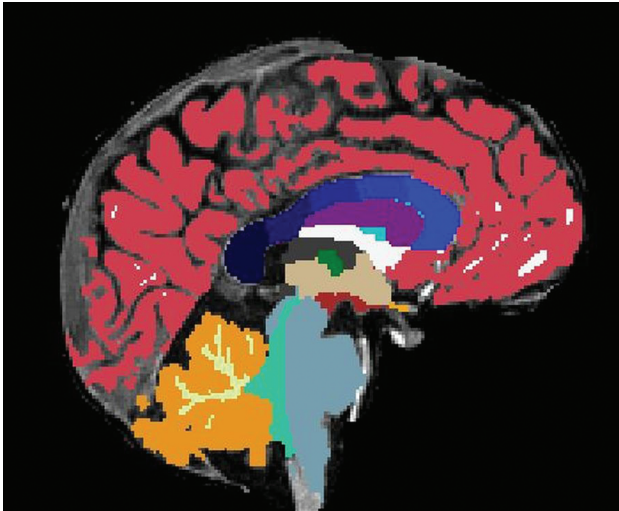

**ON-LINE FIG 6.** Example of segmentation of one of our healthy volunteers demonstrating imperfect cerebellar segmentation. The cerebellum (orange and yellow) segmentation is extending to the confluence of the transverse sinuses, and the segmentation of cerebellar gray and white matter is imperfect. These inaccuracies in segmentation likely contribute to the low Dice coefficient (0.86) compared with the other cortical regions, though it is still classified as almost perfect agreement in the general interpretation of the Dice coefficient.
